# Supplementary material for: Ammonium halide selective ion pair recognition and extraction with a chalcogen bonding heteroditopic receptor
Source: Royal Society of Chemistry journal article supplement (doi:10.1039/d4dt01376j), 2024-01-01
Supplement: d4dt01376j1.pdf [file d4dt01376j1.pdf]

## Supporting information for

### **Ammonium Halide Selective Ion Pair Recognition and Extraction with a Chalcogen Bonding Heteroditopic Receptor**

Andrew Docker,<sup>b</sup> Yuen Cheong Tse, Hui Min Tay, Zongyao Zhang, Paul D. Beer\*<sup>a</sup>

<sup>a</sup> *Chemistry Research Laboratory, Department of Chemistry, University of Oxford, Mansfield Road, Oxford OX1 3TA, U. K.*

<sup>b</sup> Yusuf Hamied Department of Chemistry, University of Cambridge, Lensfield Road, Cambridge, CB2 1EW U.K.

## Contents

|                                                       |   |
|-------------------------------------------------------|---|
| 1. Materials and Methods .....                        | 2 |
| 2. <sup>1</sup> H NMR Anion Recognition Studies ..... | 2 |
| 3. Solid Liquid Extraction (SLE) Studies .....        | 6 |
| 4. Liquid Liquid Extraction (LLE) Studies .....       | 7 |
| 5. Crystal Structure Determination .....              | 8 |

# 1. Materials and Methods

All solvents and reagents were purchased from commercial suppliers and used as received unless otherwise stated. Dry solvents were obtained by purging with nitrogen and then passing through an MBraun MPSP-800 column. H<sub>2</sub>O was de-ionized and micro filtered using a Milli-Q® Millipore machine. Routine NMR spectra were recorded on either a Varian Mercury 300, a Bruker AVIII 400 or a Bruker AVIII 500 spectrometer with <sup>1</sup>H NMR titrations recorded on a Bruker AVIII 500 spectrometer. Tetrabutylammonium (TBA) salts were stored in a vacuum desiccator containing phosphorus pentoxide prior to use. Where mixtures of solvents were used, ratios are reported by volume. Chemical shifts are quoted in parts per million relative to the residual solvent peak.

## 2. <sup>1</sup>H NMR Anion Recognition Studies

Titration Protocol: In a typical <sup>1</sup>H NMR anion titration experiment, aliquots of anion were added as their TBA salts to 0.5 ml of 1 mM solution of **1·ChB<sup>PF6</sup>** precomplexed with an equimolar quantity of NH<sub>4</sub>PF<sub>6</sub> in a CD<sub>3</sub>CN/CDCl<sub>3</sub> 1:1 (v/v) solvent mixture and the spectrum recorded.

Spectra were recorded at 0, 0.2, 0.4, 0.6, 0.8, 1.0, 1.2, 1.4, 1.6, 1.8, 2.0, 2.5, 3.0, 4.0, 5.0, 7.0 and 10 equivalents.

[**1·ChB<sup>PF6</sup>**] = 1.0 mM

[TBAX] = 50 mM, X = Cl<sup>-</sup>, Br<sup>-</sup>, I<sup>-</sup>, NO<sub>3</sub><sup>-</sup> and SCN<sup>-</sup>

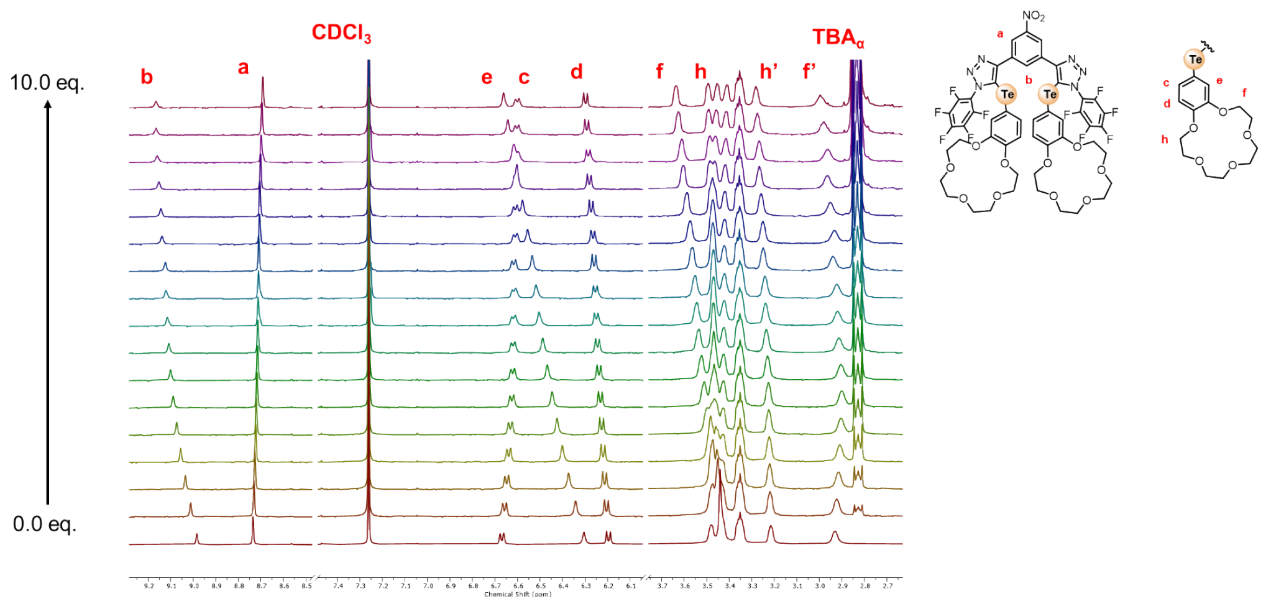

**Figure S1.** Stacked  $^1\text{H}$  NMR titration spectra of  $1\text{-ChB}^{\text{PFP}}$  (1 mM) with TBACl (50 mM) in the presence of one equivalent of  $\text{NH}_4\text{PF}_6$  (1:1  $\text{CD}_3\text{CN}:\text{CDCl}_3$  (v/v), 500 MHz, 298K).

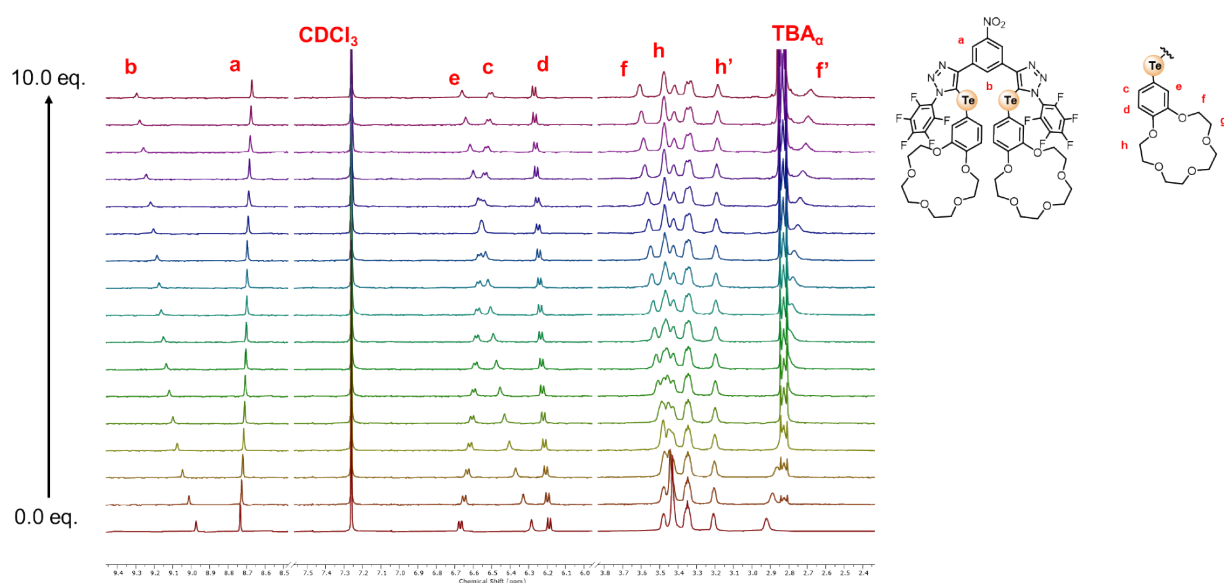

**Figure S2.** Stacked  $^1\text{H}$  NMR titration spectra of  $1\text{-ChB}^{\text{PFP}}$  (1 mM) with TBABr (50 mM) in the presence of one equivalent of  $\text{NH}_4\text{PF}_6$  (1:1  $\text{CD}_3\text{CN}:\text{CDCl}_3$  (v/v), 500 MHz, 298K).

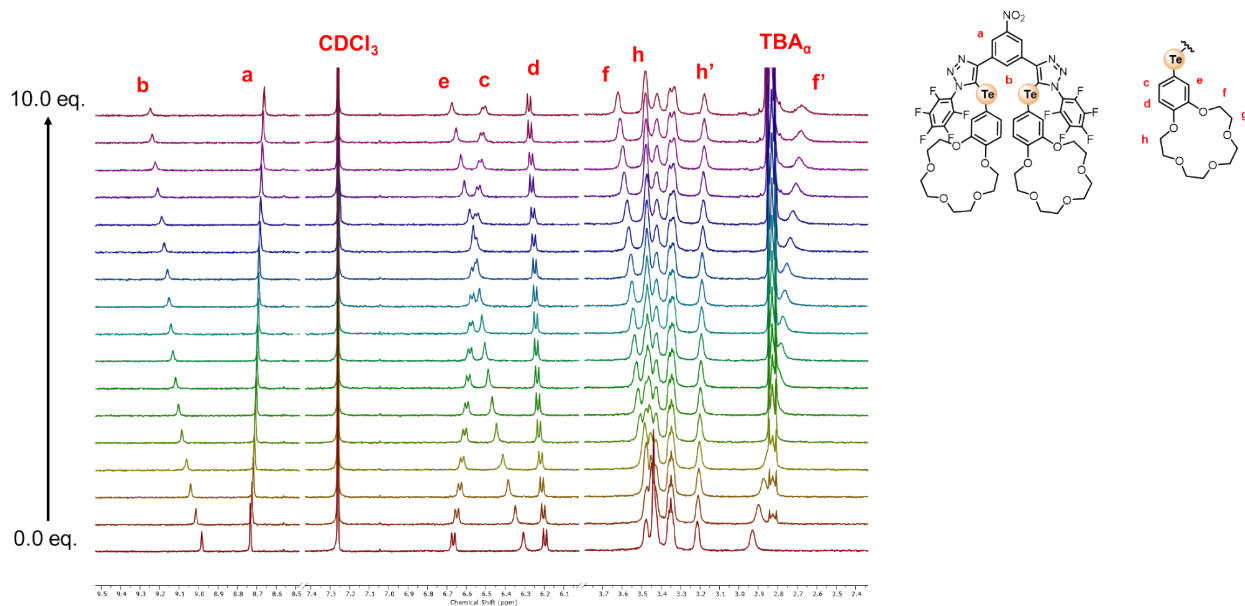

**Figure S3.** Stacked  $^1\text{H}$  NMR titration spectra of  $1\text{-ChB}^{\text{PFP}}$  (1 mM) with TBAI (50 mM) in the presence of one equivalent of  $\text{NH}_4\text{PF}_6$  (1:1  $\text{CD}_3\text{CN}:\text{CDCl}_3$  (v/v), 500 MHz, 298K).

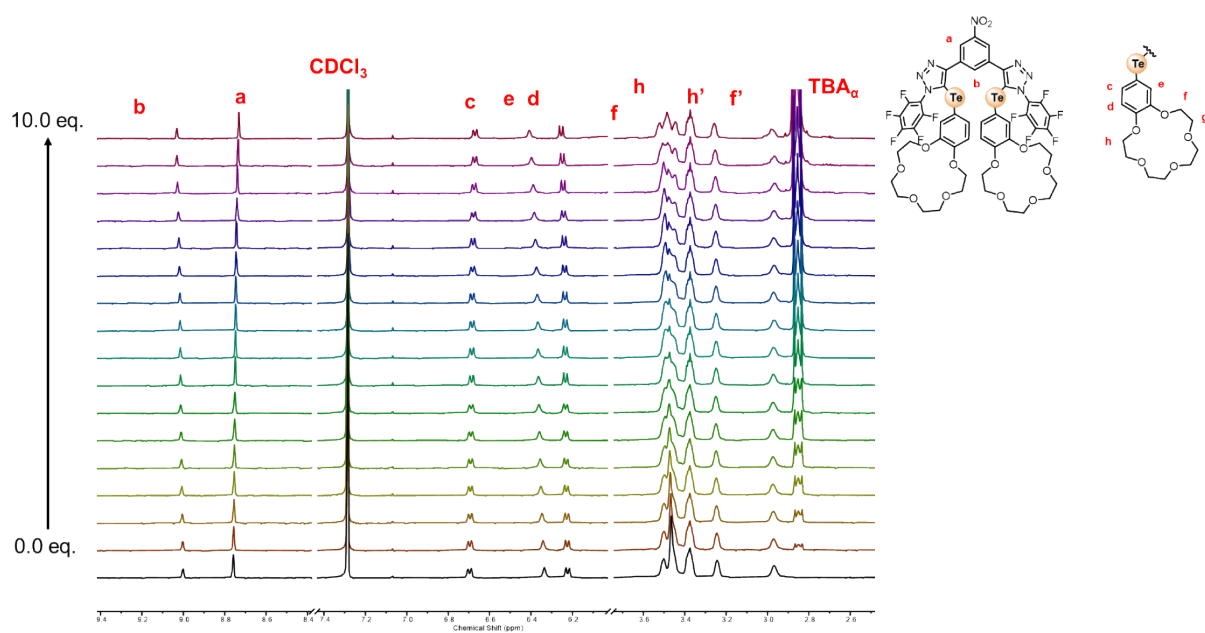

**Figure S4.** Stacked  $^1\text{H}$  NMR titration spectra of  $1\text{-ChB}^{\text{PFP}}$  (1 mM) with  $\text{TBANO}_3$  (50 mM) in the presence of one equivalent of  $\text{NH}_4\text{PF}_6$  (1:1  $\text{CD}_3\text{CN}:\text{CDCl}_3$  (v/v), 500 MHz, 298K).

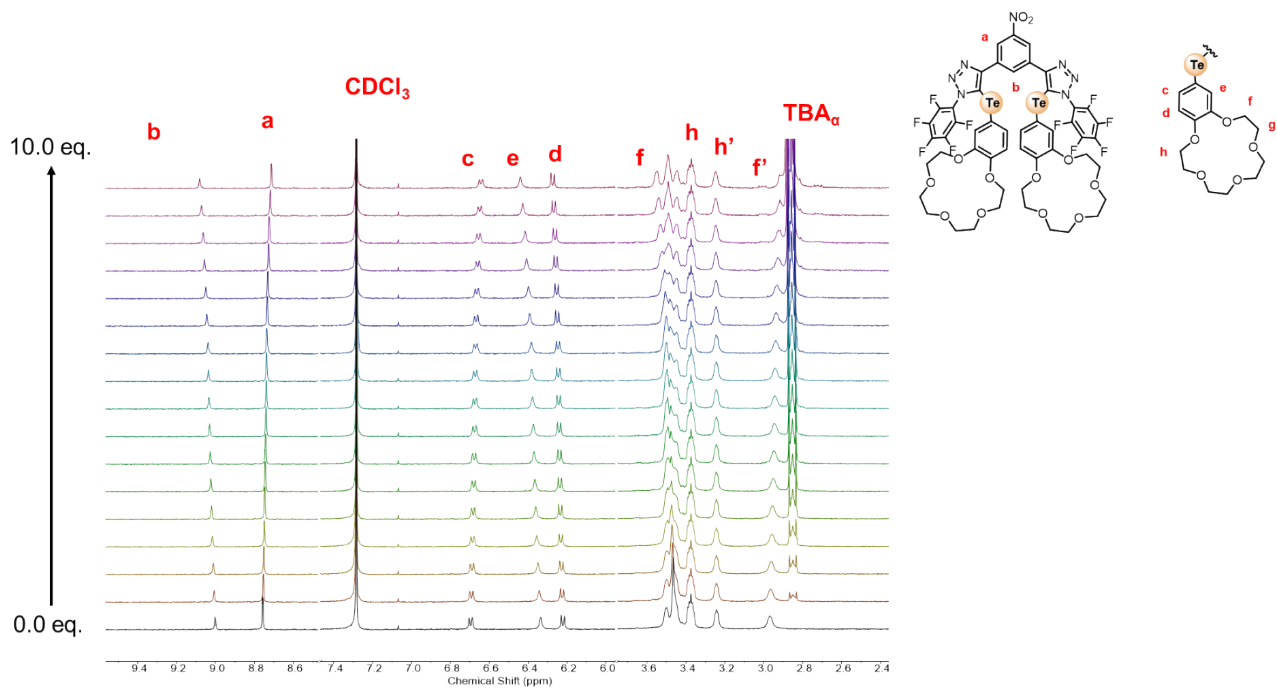

**Figure S5.** Stacked  $^1\text{H}$  NMR titration spectra of  $1 \cdot \text{ChB}^{\text{PFP}}$  (1 mM) with TBASCN (50 mM) in the presence of one equivalent of  $\text{NH}_4\text{PF}_6$  (1:1  $\text{CD}_3\text{CN}:\text{CDCl}_3$  (v/v), 500 MHz, 298K).

### 3. Solid Liquid Extraction (SLE) Studies

A 2 mM solution of **1·ChB<sup>PFP</sup>** in CDCl<sub>3</sub> (0.7 ml) was exposed to an excess (ca. 5 equivalents) of a microcrystalline sample of NH<sub>4</sub>X (X = Cl<sup>-</sup>, Br<sup>-</sup>, I<sup>-</sup>, NO<sub>3</sub><sup>-</sup>, SCN<sup>-</sup>). The mixture was sonicated for 10 minutes, after which the solution was removed and passed through a syringe filter and the <sup>1</sup>H NMR spectrum recorded.

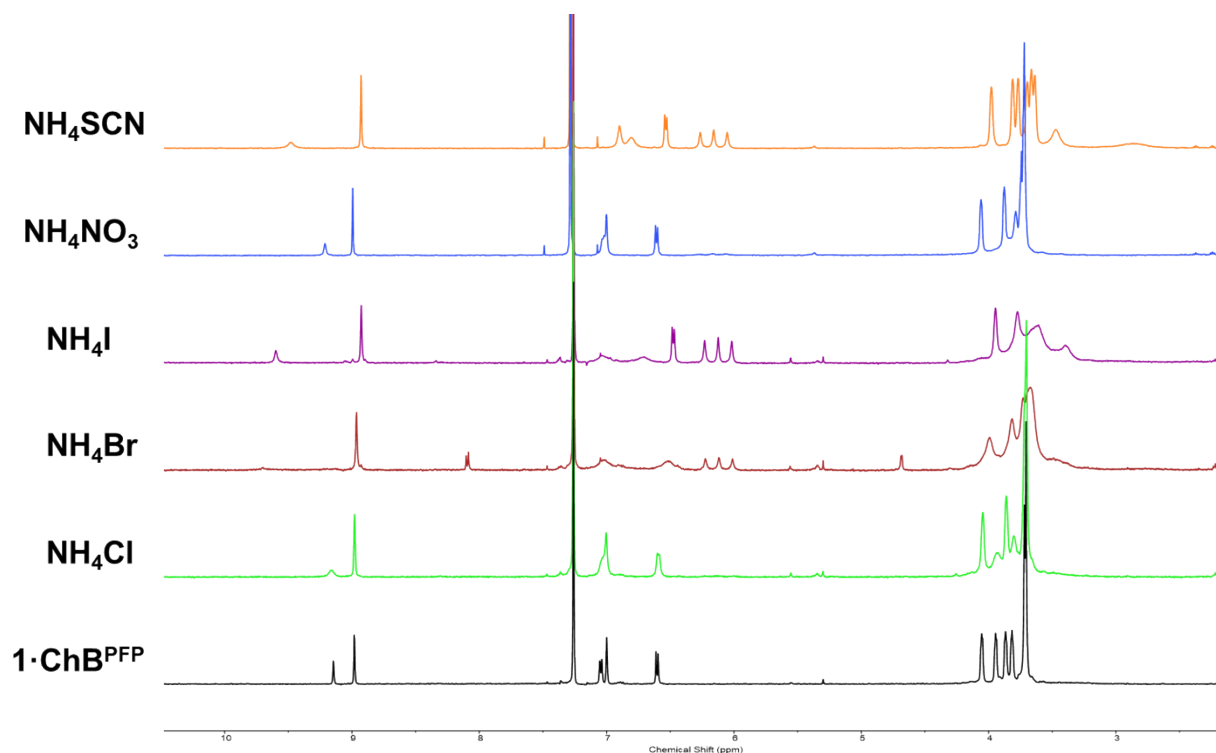

**Figure S6.** <sup>1</sup>H NMR spectrum from SLE extraction experiment of **1·ChB<sup>PFP</sup>** (CDCl<sub>3</sub>, 500 MHz, 298K).

## 4. Liquid Liquid Extraction (LLE) Studies

In a typical experiment a  $\text{CDCl}_3$  solution of the receptor (0.7 ml) was added to a  $\text{D}_2\text{O}$  solution of the  $\text{NH}_4\text{X}$  ( $\text{X} = \text{Cl}^-$ ,  $\text{Br}^-$ ,  $\text{I}^-$ ,  $\text{NO}_3^-$ ,  $\text{SCN}^-$ ) (4 M, 0.7 ml), to which was added a stirrer bar and the mixture was stirred vigorously for 30 mins. After which time the biphasic mixture was allowed to settle, the organic phase removed and the  $^1\text{H}$  NMR spectrum recorded.

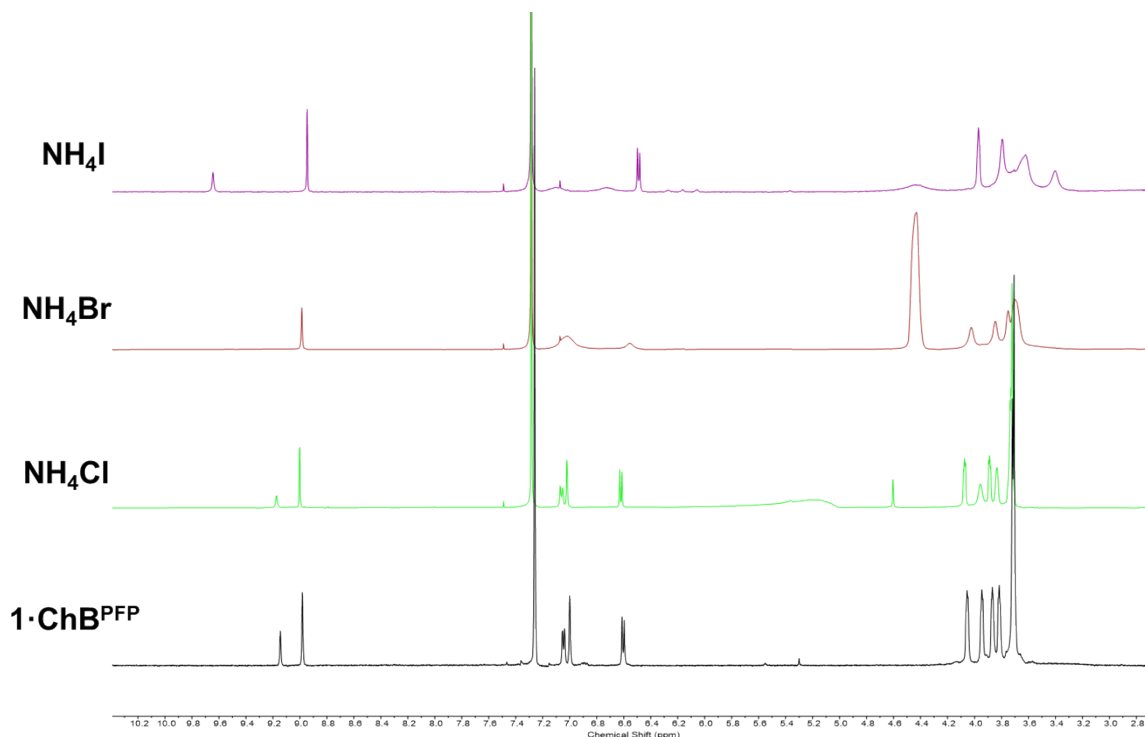

**Figure S7.**  $^1\text{H}$  NMR spectrum from LLE extraction experiment of  $1\cdot\text{ChB}^{\text{PFP}}$  ( $\text{CDCl}_3$ , 500 MHz, 298K).

## 5. Crystal Structure Determination

Single crystals of **1·ChB**<sup>PFP</sup>·NH<sub>4</sub>Br suitable for X-ray analysis were each coated with Paratone-N oil, suspended on a 200 μm MiTeGen loop, and placed in a cold gaseous nitrogen stream on an Oxford Diffraction Supernova X-ray diffractometer performing φ- and ω-scans at 150(2) K. Diffraction intensities were measured using graphite monochromated Cu K<sub>α</sub> radiation (1.54184 Å). Data collection, indexing, initial cell refinements, frame integration, final cell refinements and absorption corrections were accomplished using the program CrysAlisPro.† Scattering factors and anomalous dispersion corrections were taken from the International Tables for X-ray Crystallography. All structures were solved by direct methods and refined against F<sub>2</sub>. All hydrogen atoms were included into the model at geometrically calculated positions and refined using a riding model. Details of the data quality and a summary of the residual values for the refinements are listed in Table S1. Figures of the crystal structures have been created using the open-source PyMOL Molecular Graphics System.

Deposition Number 2155965 (for **1·ChB**<sup>PFP</sup>·NH<sub>4</sub>Br) contains the supplementary crystallographic data for this paper. This data is provided free of charge by the joint Cambridge Crystallographic Data Centre and Fachinformationszentrum Karlsruhe Access Structures service [www.ccdc.cam.ac.uk/structures](http://www.ccdc.cam.ac.uk/structures).

† CrysAlisPRO, Oxford Diffraction /Agilent Technologies UK Ltd, Yarnton, England.



**Table S1.** Crystal data and structure refinement for **1·ChB<sup>PFP</sup>**.

|                                   |                                                                                                                    |                 |
|-----------------------------------|--------------------------------------------------------------------------------------------------------------------|-----------------|
| Identification code               | 001zy21_sq                                                                                                         |                 |
| Empirical formula                 | C <sub>54</sub> H <sub>49</sub> Br Cl <sub>12</sub> F <sub>10</sub> N <sub>8</sub> O <sub>12</sub> Te <sub>2</sub> |                 |
| Formula weight                    | 1952.52                                                                                                            |                 |
| Temperature                       | 150(2) K                                                                                                           |                 |
| Wavelength                        | 1.54184 Å                                                                                                          |                 |
| Crystal system                    | Triclinic                                                                                                          |                 |
| Space group                       | P-1                                                                                                                |                 |
| Unit cell dimensions              | a = 17.2868(4) Å                                                                                                   | a = 85.749(2)°. |
|                                   | b = 20.8341(5) Å                                                                                                   | b = 89.525(2)°. |
|                                   | c = 25.0337(5) Å                                                                                                   | g = 68.431(2)°. |
| Volume                            | 8359.9(3) Å <sup>3</sup>                                                                                           |                 |
| Z                                 | 4                                                                                                                  |                 |
| Density (calculated)              | 1.551 Mg/m <sup>3</sup>                                                                                            |                 |
| Absorption coefficient            | 10.267 mm <sup>-1</sup>                                                                                            |                 |
| F(000)                            | 3832                                                                                                               |                 |
| Crystal size                      | 0.400 x 0.400 x 0.400 mm <sup>3</sup>                                                                              |                 |
| Theta range for data collection   | 3.542 to 76.468°.                                                                                                  |                 |
| Index ranges                      | -21<=h<=21, -26<=k<=26, -31<=l<=30                                                                                 |                 |
| Reflections collected             | 191943                                                                                                             |                 |
| Independent reflections           | 34679 [R(int) = 0.0633]                                                                                            |                 |
| Completeness to theta = 67.684°   | 99.9 %                                                                                                             |                 |
| Absorption correction             | Sphere                                                                                                             |                 |
| Max. and min. transmission        | 0.13143 and 0.03628                                                                                                |                 |
| Refinement method                 | Full-matrix least-squares on F <sup>2</sup>                                                                        |                 |
| Data / restraints / parameters    | 34679 / 20 / 1783                                                                                                  |                 |
| Goodness-of-fit on F <sup>2</sup> | 0.862                                                                                                              |                 |
| Final R indices [I>2sigma(I)]     | R1 = 0.0586, wR2 = 0.1837                                                                                          |                 |
| R indices (all data)              | R1 = 0.0658, wR2 = 0.2026                                                                                          |                 |
| Extinction coefficient            | n/a                                                                                                                |                 |
| Largest diff. peak and hole       | 1.989 and -1.377 e.Å <sup>-3</sup>                                                                                 |                 |
